# Supplementary material for: Characterization of mRNA Signature in Milk Small Extracellular Vesicles from Cattle Infected with Bovine Leukemia Virus
Source: MDPI journal article supplement (doi:10.3390/pathogens12101239), 2023-10-13
Supplement: s1 [file s1]

# Original full blot image

## 1 (a) Surface-marker CD63

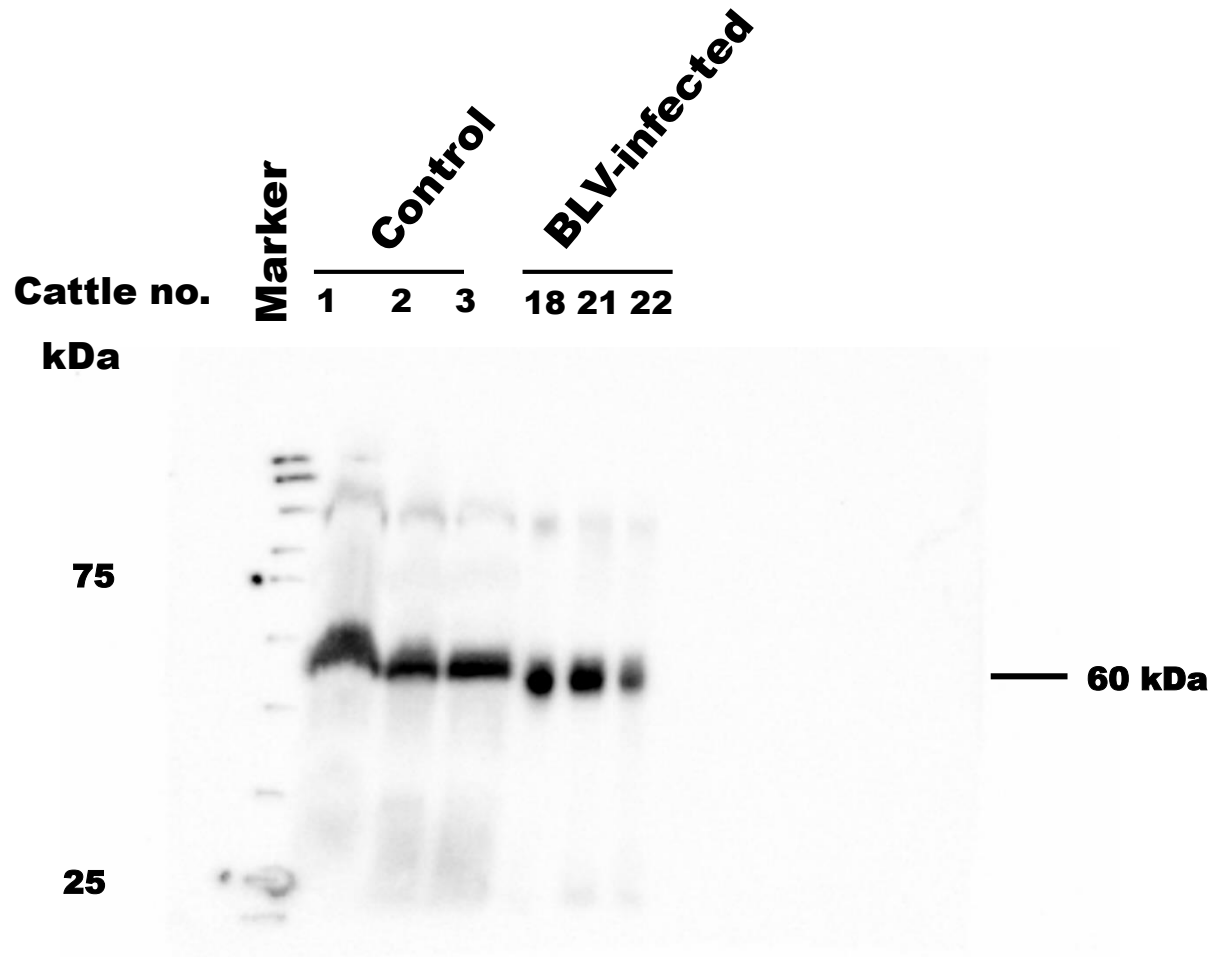

**Supplementary Figure S1 (a)**

# Original full blot image

## 1 (b) Internal-marker HSP70

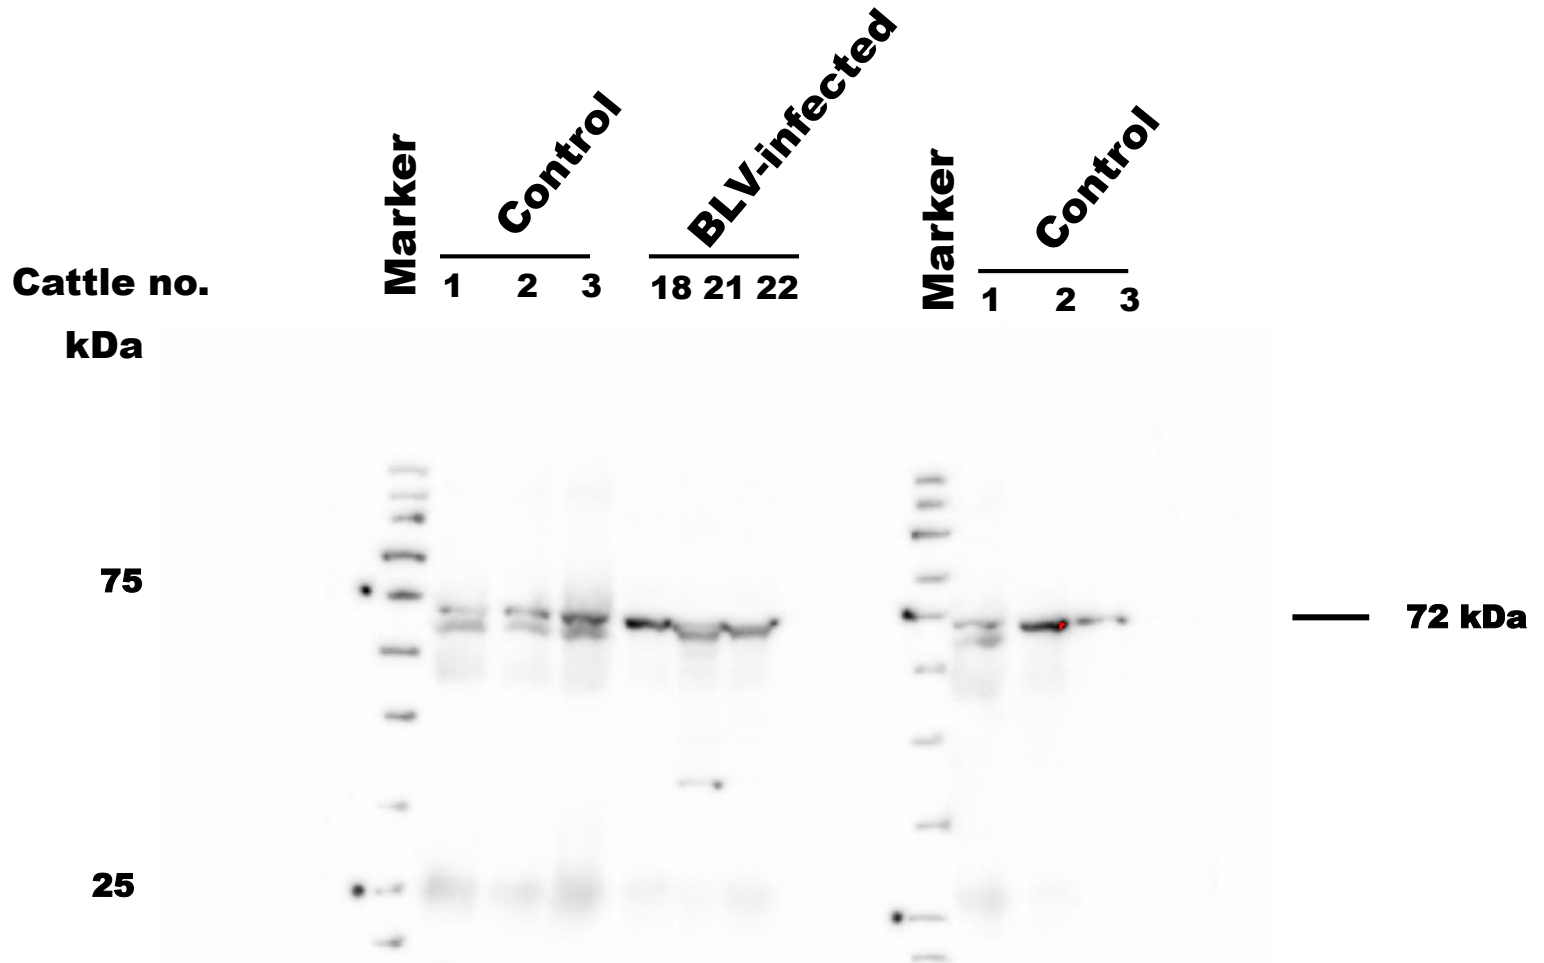

**Supplementary Figure S1 (b)**

# Original full blot image

## 1 (c) Contaminant-marker apoA1

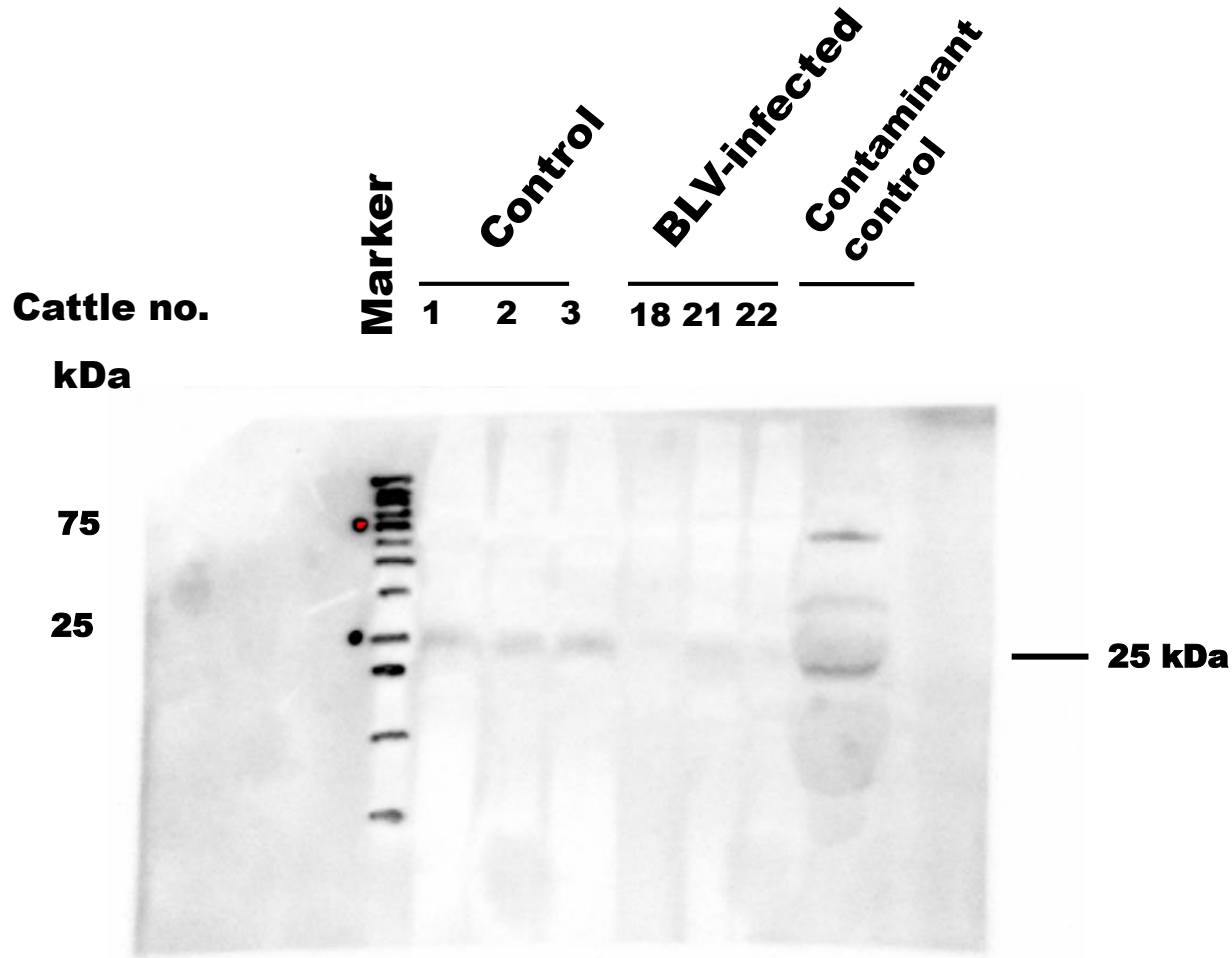

**Supplementary Figure S1 (c)**
