# Supplementary material for: Characterization of mRNA Signature in Milk Small Extracellular Vesicles from Cattle Infected with Bovine Leukemia Virus
Source: MDPI journal article supplement (doi:10.3390/pathogens12101239), 2023-10-13
Supplement: s1 [file s1]

**Supplementary Table S1. Selected 23 mRNA list in milk sEVs from BLV-infected cattle.**

| <b>Gene name</b>                                              | <b>Gene symbol</b> | <b>Fold change</b> | <b>Functions</b>       | <b>Reference</b> |
|---------------------------------------------------------------|--------------------|--------------------|------------------------|------------------|
| <i>Myoferlin</i>                                              | <i>MYOF</i>        | 12.67              | Tumor metastasis       | [32]             |
| <i>Transmembrane protein 156</i>                              | <i>TMEM156</i>     | 10.79              | Cancer invasion        | [33]             |
| <i>Interleukin 33</i>                                         | <i>IL33</i>        | 6.06               | Cancer metastasis      | [34]             |
| <i>Ubiquitin conjugating enzyme E2 C</i>                      | <i>UBE2C</i>       | 5.61               | Tumor progression      | [35]             |
| <i>Microtubule associated protein 9</i>                       | <i>MAP9</i>        | 3.50               | Cancer progression     | [36]             |
| <i>Pyruvate dehydrogenase kinase 3</i>                        | <i>PDK3</i>        | 3.17               | Tumor proliferation    | [37]             |
| <i>SPC24 component of NDC80 kinetochore complex</i>           | <i>SPC24</i>       | 3.14               | Tumorigenesis          | [38]             |
| <i>Cyclin B1</i>                                              | <i>CCNB1</i>       | 2.50               | Cellular proliferation | [39]             |
| <i>MHC class I JSP.1</i>                                      | <i>JSP.1</i>       | 2.46               | Apoptosis              | [40]             |
| <i>Transforming growth factor beta receptor 1</i>             | <i>TGFBR1</i>      | 1.51               | Cellular-metabolism    | [41]             |
| <i>Mohawk homeobox</i>                                        | <i>MKX</i>         | 1.50               | Tissue differentiation | [42]             |
| <i>Bovine major histocompatibility complex</i>                | <i>BoLA</i>        | 1.28               | BLV infectivity        | [43]             |
| <i>Mitochondrial ribosomal protein L1351</i>                  | <i>L13</i>         | 1.26               | Immune response        | [44]             |
| <i>Synaptosome associated protein 47</i>                      | <i>SNAP47</i>      | 1.14               | Cancer invasion        | [45]             |
| <i>Succinate dehydrogenase complex flavoprotein subunit A</i> | <i>SDHA</i>        | 1.14               | Cellular metabolism    | [46]             |
| <i>Cell division cycle 20</i>                                 | <i>CDC20</i>       | 1.13               | Cellular proliferation | [47]             |
| <i>Arginine and serine rich protein 1</i>                     | <i>RSRP1</i>       | 1.08               | Cell invasion          | [48]             |
| <i>Apoptosis resistant E3 ubiquitin protein ligase 1</i>      | <i>AREL1</i>       | 1.01               | Anti-apoptosis         | [49]             |
| <i>Calbindin 1</i>                                            | <i>CALB1</i>       | -1.51              | Metabolism             | [50]             |
| <i>Integrin subunit beta 2</i>                                | <i>ITGB2</i>       | -1.39              | Cancer proliferation   | [51]             |
| <i>Hypoxanthine phosphoribosyl transferase 1</i>              | <i>HPRT</i>        | -1.13              | Cell cycle progression | [52]             |
| <i>Stomatin like 2</i>                                        | <i>STOML2</i>      | -1.03              | Metastasis             | [53]             |
| <i>WD repeat domain 89</i>                                    | <i>WDR89</i>       | -1.02              | Cell cycle             | [54]             |
