# Supplementary material for: Characterization of mRNA Signature in Milk Small Extracellular Vesicles from Cattle Infected with Bovine Leukemia Virus
Source: MDPI journal article supplement (doi:10.3390/pathogens12101239), 2023-10-13
Supplement: s1 [file s1]

**Supplementary Table S2. Oligonucleotide primers used for qPCR analysis.**

| <b>Gene symbol</b> | <b>Primer sequences (5'-3')</b>                                   |
|--------------------|-------------------------------------------------------------------|
| <i>AREL1</i>       | F: GGACCTCGTTTAAAGCTGCTGTG<br>R: TATAGTCCGGTCCCCCTCGGC            |
| <i>BoLA</i>        | F: CGGAAGGTTATGCTGAGGTACA<br>R: AGCGTGTCTTCCCATTCTC               |
| <i>CALB1</i>       | F: CGCCCTGAGTTCCTTCTCC<br>R: AGGTGGGATTCTGCCATCGT                 |
| <i>CCNB1</i>       | F: TGGGTCCGCCTCTACCTTTGCACTTC<br>R: CGATGTGGCATACTTGTTCTTGATAGTCA |
| <i>CDC20</i>       | F: AGTCTGACCATGAGCCCAGA<br>R: ATGCCTTGGTGGATGAGGC                 |
| <i>HPRT</i>        | F: TGAGGATTGGAAGGGTGT<br>R: GAGCACACAGAGGGCTACAA                  |
| <i>IL33</i>        | F: AATGCTCAGCAGGCAAAGCC<br>R: TCAGCTGCTCACAGGCAACT                |
| <i>ITGB2</i>       | F: CCCAGGATGCACCAACTAC<br>R: TGTGTACACAGCGAATGGAGT                |
| <i>JSP.1</i>       | F: CAGGAGGGGCCGAGTATTG<br>R: TAGCCGAACTGCCAGAACCC                 |
| <i>L13</i>         | F: CGGACCGTGCGAGGTAT<br>R: CACCATCCGCTTTTCTTGTC                   |
| <i>MAP9</i>        | F: CAGTGCATCTGGCAGATTAATGAC<br>R: GCTGTGACGGAATCCTCC              |
| <i>MKX</i>         | F: AATCGCCCCCTTTGCTCCCT<br>R: GTGTCTCAGGCCAGGTGT                  |
| <i>MYOF</i>        | F: TCTATCAAGCCAGGAACCTCATG<br>R: GGTTTTACTTCGATGAAGGAAGGA         |
| <i>PDK3</i>        | F: TGAAGCTGACGATTGGAGCA<br>R: CATCTTGTCTGTGTTTGCCTTGT             |
| <i>RSRP1</i>       | F: TGGGCAAATGCCTTAGTTCTTTT<br>R: GGCTTTGCTACAGAATTGTTAGAGC        |
| <i>SDHA</i>        | F: TTTGATGCAGTGGTGGTAGG<br>R: CAGAGCAGCATTGATTCCCTC               |
| <i>SNAP47</i>      | F: GAGTCTCCACCATCAGGGC<br>R: CCGATGGCGTCTTCCAAAGC                 |
| <i>SPC24</i>       | F: TGCGAGAGATCCTCACCACA<br>R: TTGTGAGCTGAAGGAGGTGG                |
| <i>STOML2</i>      | F: CCCGGCGACGTTACCAGTAT<br>R: GGCAGGGAGGCTAGAACCAG                |
| <i>TGFBR1</i>      | F: CAGGTTTACCATTGCTTGTTCA<br>R: TGCCATTGTCTTTATTGTCTGC            |
| <i>TMEM156</i>     | F: GTGCAGAAAGTGGCAGAGTCAT<br>R: AGGAAGCACGTCCTTGACTG              |
| <i>UBE2C</i>       | F: ACGGTGAAGTTCCTCACACC<br>R: AGAACACAGGGAGAGCTGGA                |
| <i>WDR89</i>       | F: TCTGTGCTCGAGTCCGTTCC<br>R: AGGTTCAAGTGGTTGGTGCCT               |
